# Supplementary material
Source: PubMed Central journal article supplement (PMC4284418)
Supplement: CJN.06190614_CJN06190614SupplementaryData.pdf [file CJN.06190614_CJN06190614SupplementaryData.pdf]

## SUPPLEMENTARY APPENDIX

### **Fibroblast growth factor 23 and incident chronic kidney disease in type 2 diabetes**

RUNNING TITLE: FGF23 and incident CKD in type 2 diabetes

Tamara Isakova, MD, MMSc,<sup>1</sup> Timothy Craven, MSPH,<sup>2</sup> Jungwha Lee, PhD,<sup>3</sup> Julia Scialla, MD, MHS,<sup>4</sup>  
Huiliang Xie, PhD,<sup>4</sup> Patricia Wahl, PhD,<sup>4</sup> Santica Marcovina, PhD, DSc,<sup>5</sup> Robert P. Byington, PhD,<sup>6</sup>  
and Myles Wolf, MD, MMSc<sup>1</sup>

From:

<sup>1</sup>Department of Medicine, Institute of Public Health and Medicine, Feinberg School of Medicine, Northwestern University, Chicago, IL

<sup>2</sup>Department of Biostatistical Sciences, Division of Public Health Sciences, Wake Forest University Health Sciences, Winston-Salem, NC

<sup>3</sup>Department of Preventative Medicine, Division of Biostatistics, Feinberg School of Medicine, Northwestern University, Chicago, IL

<sup>4</sup>Division of Nephrology and Hypertension, Department of Medicine, Miller School of Medicine, University of Miami, Miami, FL

<sup>5</sup>Department of Medicine, Division of Metabolism, Endocrinology and Nutrition, University of Washington School of Medicine, Seattle, WA

<sup>6</sup>Department of Epidemiology and Prevention, Division of Public Health Sciences, Wake Forest University Health Sciences, Winston-Salem, NC

Corresponding Author: Tamara Isakova, MD, MMSc

633 N. St. Clair Street, Chicago, IL 60611. Email: [tamara.isakova@northwestern.edu](mailto:tamara.isakova@northwestern.edu)

**Supplementary Table 1. Baseline characteristics of all 1110 analyzed participants according to quartiles of FGF23**

| Fibroblast growth factor 23, pg/ml       | All Participants<br>N = 1110 | Quartile 1<br>N = 241<br><31.9 | Quartile 2<br>N = 261<br>31.9 – 39.9 | Quartile 3<br>N = 286<br>40.0 – 50.2 | Quartile 4<br>N = 322<br>≥ 50.3 |
|------------------------------------------|------------------------------|--------------------------------|--------------------------------------|--------------------------------------|---------------------------------|
| Age, years                               | 62.4 ± 6.4                   | 62.1 ± 5.9                     | 62.0 ± 6.8                           | 62.4 ± 6.3                           | 62.9 ± 6.5                      |
| Female (%)                               | 50.0                         | 47.3                           | 41.4                                 | 48.6                                 | 60.3                            |
| Black (%)                                | 16.5                         | 19.9                           | 16.1                                 | 16.1                                 | 14.6                            |
| Hispanic (%)                             | 4.9                          | 6.6                            | 8.1                                  | 3.15                                 | 2.5                             |
| Hypertension (%)                         | 91.0                         | 88.4                           | 88.9                                 | 94.1                                 | 91.9                            |
| History of stroke (%)                    | 5.2                          | 7.1                            | 5.0                                  | 4.2                                  | 5.0                             |
| History of myocardial infarction (%)     | 14.2                         | 14.5                           | 15.3                                 | 16.8                                 | 10.9                            |
| History of heart failure (%)             | 5.6                          | 7.1                            | 6.3                                  | 6.0                                  | 3.4                             |
| Current smoking (%)                      | 10.1                         | 10.0                           | 13.4                                 | 11.2                                 | 6.5                             |
| Body mass index, kg/m <sup>2</sup>       | 32.7 ± 5.5                   | 32.1 ± 5.6                     | 32.1 ± 5.6                           | 32.6 ± 5.3                           | 33.6 ± 5.6                      |
| Systolic blood pressure, mm Hg           | 135.4 ± 16.8                 | 135.6 ± 17.1                   | 135.2 ± 16.4                         | 135.4 ± 16.9                         | 135.4 ± 16.7                    |
| Diabetes duration, years                 | 10 (5 – 14)                  | 8 (5 – 12)                     | 10 (5 – 16)                          | 10 (5 – 14)                          | 10 (6 – 14)                     |
| <b>Medication use (%)</b>                |                              |                                |                                      |                                      |                                 |
| Aspirin                                  | 56.2                         | 56.0                           | 54.8                                 | 59.4                                 | 54.7                            |
| Beta blockers                            | 28.1                         | 25.7                           | 26.8                                 | 30.8                                 | 28.6                            |
| Statins                                  | 63.2                         | 56.9                           | 68.2                                 | 65.0                                 | 62.4                            |
| Angiotensin-converting enzyme inhibitors | 49.7                         | 50.6                           | 49.0                                 | 52.8                                 | 46.9                            |
| Angiotensin receptor blockers            | 18.4                         | 15.8                           | 14.2                                 | 20.6                                 | 21.7                            |
| Insulin                                  | 35.3                         | 30.3                           | 36.0                                 | 35.0                                 | 38.8                            |
| Thiazolidinediones                       | 20.5                         | 17.4                           | 18.0                                 | 23.1                                 | 22.7                            |
| Sulfonylureas                            | 51.9                         | 53.5                           | 50.6                                 | 51.8                                 | 51.9                            |
| <b>Laboratory Results</b>                |                              |                                |                                      |                                      |                                 |
| Hemoglobin A1C, %                        | 8.2 ± 1.0                    | 8.3 ± 1.1                      | 8.2 ± 1.0                            | 8.2 ± 0.9                            | 8.2 ± 0.9                       |
| Creatinine, mg/dl                        | 0.88 ± 0.17                  | 0.86 ± 0.19                    | 0.89 ± 0.18                          | 0.88 ± 0.17                          | 0.88 ± 0.16                     |
| eGFR, ml/min/1.73m <sup>2</sup>          | 86.4 ± 19.4                  | 91.1 ± 27.2                    | 87.5 ± 17.5                          | 85.7 ± 16.6                          | 82.8 ± 15.1                     |
| Urine albumin/creatinine ratio, mg/g     | 8.8 (5.7 – 14.6)             | 9.2 (6.3 – 14.7)               | 8.2 (5.4 – 14.1)                     | 8.7 (5.6 – 14.2)                     | 8.6 (5.5 – 15.8)                |
| Phosphate, mg/dl                         | 3.5 ± 0.5                    | 3.3 ± 0.5                      | 3.4 ± 0.5                            | 3.5 ± 0.5                            | 3.7 ± 0.5                       |

The FGF23 quartiles are defined based on the distribution of FGF23 in the random subcohort.

Abbreviations: eGFR, estimated glomerular filtration rate.

Values are %, means ± standard deviation, or medians (interquartile range).

Serum creatinine and eGFR values are from the month-4 follow up visit.

**Supplementary Table 2. Top independent predictors of baseline FGF23 levels in 590 subcohort participants**

|                                                 | <b>T Value</b> | <b>Beta</b> | <b>Standard Error</b> | <b>P value</b> |
|-------------------------------------------------|----------------|-------------|-----------------------|----------------|
| Phosphate, per 1 unit increase                  | 5.22           | 0.16        | 0.03                  | <0.001         |
| eGFR, per 1 unit increase                       | -3.52          | -0.002      | 0.001                 | <0.001         |
| BMI, per 1 unit increase                        | 3.19           | 0.009       | 0.003                 | 0.002          |
| Black                                           | -1.95          | -0.08       | 0.04                  | 0.05           |
| Hispanic                                        | -1.12          | -0.08       | 0.07                  | 0.26           |
| Hemoglobin A1C,<br>per 1 unit increase          | -1.03          | -0.02       | 0.02                  | 0.30           |
| ln UACR, per 1 unit increase                    | 0.58           | 0.01        | 0.02                  | 0.56           |
| Systolic blood pressure,<br>per 1 unit increase | 0.54           | 0.0005      | 0.001                 | 0.59           |
| Smoking                                         | -0.30          | -0.01       | 0.05                  | 0.77           |
| Age, per 1 unit increase                        | 0.15           | 0.0004      | 0.003                 | 0.88           |
| History of any CVD                              | -0.10          | -0.003      | 0.03                  | 0.92           |
| Female                                          | 0.04           | 0.001       | 0.03                  | 0.97           |

Abbreviations: BMI, body mass index; eGFR, estimated glomerular filtration rate; CVD, cardiovascular disease; UACR, urine albumin-to-creatinine ratio.
